# Supplementary material for: Elevated glucose increases genomic instability by inhibiting nucleotide excision repair
Source: Life Sci Alliance. 2021 Aug 23;4(10):e202101159. doi: 10.26508/lsa.202101159 (PMC8385305; doi:10.26508/lsa.202101159)
Supplement: Supplementary file 3 [file LSA-2021-01159_Supplemental_Data_2.xlsx]

## Sheet: WT HG vs. WT LG
	Log2 fold change	std error	Lower confidence limit	Upper confidence limit	P-value	BY.p.value	Gene.sets	probe.ID
PGAM1-mRNA	1.19	0.0315	1.13	1.25	2.69e-10	2.37e-07	Carbon Metabolism, KEGG Glycolysis	NM_002629.2:1037
LDHA-mRNA	1.11	0.0361	1.04	1.18	1.39e-09	3.29e-07	Hypoxia Signaling, KEGG Glycolysis	NM_001165414.1:1690
MYC-mRNA	-1.28	0.0422	-1.36	-1.2	1.53e-09	3.29e-07	Cancer Metabolism Drivers, Carbon Metabolism	NM_002467.3:1610
PKM-mRNA	1.02	0.034	0.957	1.09	1.6e-09	3.29e-07	Carbon Metabolism	NM_182471.1:2105
JUN-mRNA	-1.58	0.0534	-1.68	-1.47	1.87e-09	3.29e-07	Cancer Metabolism Drivers, Carbon Metabolism, Choline Metabolism	NM_002228.3:140
PGK1-mRNA	0.83	0.0291	0.773	0.887	2.46e-09	3.31e-07	Carbon Metabolism, Glucose Metabolism, KEGG Glycolysis	NM_000291.2:1030
RPS6KB1-mRNA	-0.589	0.0211	-0.631	-0.548	2.95e-09	3.31e-07	Carbon Metabolism, Choline Metabolism, MTOR Pathway	NM_003161.2:310
PGLS-mRNA	-1.41	0.0507	-1.51	-1.31	3.02e-09	3.31e-07	Glucose Metabolism	NM_012088.2:611
ODC1-mRNA	1.13	0.042	1.05	1.21	3.91e-09	3.51e-07	Other Metabolic Pathway	NM_002539.1:950
ACLY-mRNA	1.11	0.0414	1.03	1.19	4e-09	3.51e-07	Glucose Metabolism	NM_002197.2:2290
PDHA1-mRNA	0.616	0.0235	0.57	0.662	4.79e-09	3.83e-07	Carbon Metabolism, Glucose Metabolism, KEGG Glycolysis	NM_000284.3:1080
TPI1-mRNA	0.668	0.028	0.613	0.723	1.01e-08	6.95e-07	Glucose Metabolism, KEGG Glycolysis	NM_000365.4:1020
IDH2-mRNA	-0.846	0.0355	-0.916	-0.777	1.03e-08	6.95e-07	Cancer Metabolism Drivers, Glucose Metabolism	NM_002168.2:944
G6PD-mRNA	0.651	0.029	0.594	0.708	1.66e-08	1.04e-06	Carbon Metabolism, Glucose Metabolism	NM_000402.2:1155
IKBKB-mRNA	-0.987	0.0453	-1.08	-0.898	2.08e-08	1.22e-06	MTOR Pathway	NM_001556.1:1995
PRKAB1-mRNA	-0.856	0.0407	-0.936	-0.776	2.78e-08	1.52e-06	Other Metabolic Pathway	NM_006253.4:1550
ENO1-mRNA	0.572	0.0276	0.518	0.626	3.12e-08	1.53e-06	Carbon Metabolism, Glucose Metabolism, KEGG Glycolysis	NM_001428.2:1689
SCO2-mRNA	0.836	0.0405	0.757	0.916	3.17e-08	1.53e-06	Other Metabolic Pathway	NM_005138.2:783
IDH1-mRNA	2.31	0.113	2.09	2.53	3.32e-08	1.53e-06	Cancer Metabolism Drivers, Glucose Metabolism	NM_005896.2:105
PRPS1-mRNA	0.642	0.0321	0.579	0.705	4.11e-08	1.81e-06	Glucose Metabolism	NM_002764.3:1081
FOXO3-mRNA	-0.625	0.0324	-0.689	-0.562	5.41e-08	2.26e-06	Other Metabolic Pathway	NM_001455.2:1860
TKT-mRNA	-0.768	0.0416	-0.85	-0.687	7.68e-08	3.07e-06	Glucose Metabolism	NM_001064.2:1235
SLC38A2-mRNA	-1.18	0.0666	-1.31	-1.05	1.06e-07	4.04e-06	Carbon Metabolism	NM_018976.4:1170
PFKM-mRNA	-0.484	0.0278	-0.538	-0.429	1.23e-07	4.49e-06	Carbon Metabolism, KEGG Glycolysis	NM_000289.5:2195
PIK3CA-mRNA	-0.614	0.0377	-0.688	-0.54	2.02e-07	7.09e-06	Carbon Metabolism, Choline Metabolism, MTOR Pathway	NM_006218.2:2445
SUCLG2-mRNA	-0.715	0.0469	-0.807	-0.623	3.37e-07	1.14e-05	Glucose Metabolism	NM_001177599.1:600
TP53-mRNA	-0.507	0.0334	-0.573	-0.442	3.53e-07	1.15e-05	Cancer Metabolism Drivers, Carbon Metabolism	NM_000546.2:1330
AKT3-mRNA	-0.911	0.0614	-1.03	-0.79	4.22e-07	1.33e-05	Carbon Metabolism, Choline Metabolism, MTOR Pathway	NM_005465.4:287
FASN-mRNA	0.851	0.0577	0.738	0.964	4.39e-07	1.33e-05	Other Metabolic Pathway	NM_004104.4:5387
VEGFA-mRNA	-1.09	0.074	-1.23	-0.941	4.6e-07	1.35e-05	MTOR Pathway	NM_001025366.1:1325
ACO1-mRNA	0.948	0.0688	0.813	1.08	7.45e-07	2.11e-05	Glucose Metabolism	NM_002197.2:430
PLCG1-mRNA	-0.58	0.0425	-0.663	-0.496	8.01e-07	2.2e-05	Carbon Metabolism, Choline Metabolism	NM_002660.2:2290
ARNT-mRNA	-0.813	0.0605	-0.931	-0.694	8.99e-07	2.39e-05	Hypoxia Signaling	NM_178426.1:2235
TSC2-mRNA	-0.669	0.0521	-0.771	-0.567	1.28e-06	3.31e-05	Choline Metabolism, MTOR Pathway	NM_000548.3:2380
DLAT-mRNA	0.396	0.0318	0.334	0.458	1.6e-06	3.92e-05	Glucose Metabolism, KEGG Glycolysis	NM_001931.4:1744
OAZ2-mRNA	0.434	0.0348	0.366	0.502	1.61e-06	3.92e-05	Other Metabolic Pathway	NM_002537.2:366
BPGM-mRNA	0.783	0.0631	0.659	0.907	1.66e-06	3.95e-05	Glucose Metabolism, KEGG Glycolysis	NM_199186.1:1370
DLST-mRNA	-0.392	0.0318	-0.455	-0.33	1.72e-06	3.98e-05	Glucose Metabolism	NM_001933.4:2330
EIF4EBP1-mRNA	-0.376	0.0309	-0.437	-0.316	1.92e-06	4.32e-05	Carbon Metabolism, Choline Metabolism, Hypoxia Signaling, MTOR Pathway	NM_004095.3:363
SHMT1-mRNA	0.624	0.0518	0.523	0.726	2.07e-06	4.45e-05	Other Metabolic Pathway	NM_148918.1:1800
EGLN3-mRNA	1.36	0.113	1.14	1.58	2.07e-06	4.45e-05	Carbon Metabolism, Hypoxia Signaling	NM_022073.3:800
RPS6KB2-mRNA	-0.574	0.0484	-0.669	-0.479	2.35e-06	4.92e-05	Carbon Metabolism, Choline Metabolism, MTOR Pathway	NM_003952.2:980
SDHB-mRNA	0.387	0.0329	0.322	0.451	2.52e-06	5.13e-05	Glucose Metabolism, Hypoxia Signaling	NM_003000.2:245
SLC16A1-mRNA	0.651	0.0556	0.542	0.76	2.57e-06	5.13e-05	Carbon Metabolism	NM_003051.3:635
MAP2K2-mRNA	-0.505	0.0461	-0.595	-0.415	4.29e-06	8.38e-05	Carbon Metabolism, Choline Metabolism	NM_030662.2:1325
MLST8-mRNA	-0.394	0.0363	-0.465	-0.322	4.63e-06	8.84e-05	MTOR Pathway	NM_001199173.1:810
SDHD-mRNA	0.701	0.0664	0.57	0.831	5.66e-06	0.000106	Glucose Metabolism	NM_003002.1:525
GYS1-mRNA	0.563	0.0538	0.458	0.668	6.06e-06	0.000111	Glucose Metabolism	NM_002103.4:3286
PDPR-mRNA	-0.846	0.0815	-1.01	-0.686	6.4e-06	0.000115	Glucose Metabolism	NM_017990.3:7080
TSC1-mRNA	-0.63	0.0617	-0.75	-0.509	7.27e-06	0.000128	Choline Metabolism, MTOR Pathway	NM_000368.3:100
EGLN2-mRNA	0.53	0.0526	0.426	0.633	8.08e-06	0.000139	Carbon Metabolism, Hypoxia Signaling	NM_053046.3:1538
PTEN-mRNA	-0.543	0.0552	-0.652	-0.435	9.56e-06	0.000161	Carbon Metabolism	NM_000314.4:1351
PRKAA1-mRNA	-0.415	0.0424	-0.498	-0.332	1e-05	0.000166	MTOR Pathway	NM_006251.5:1455
PDHB-mRNA	0.509	0.0523	0.406	0.611	1.04e-05	0.000169	Carbon Metabolism, Glucose Metabolism, KEGG Glycolysis	NM_000925.3:555
MAPKAP1-mRNA	0.327	0.0344	0.259	0.394	1.25e-05	0.000199	MTOR Pathway	NM_001006617.1:1188
PDGFA-mRNA	-1.74	0.184	-2.1	-1.38	1.31e-05	0.000206	Carbon Metabolism, Choline Metabolism	NM_002607.5:1276
SP1-mRNA	-0.553	0.0635	-0.677	-0.428	2.37e-05	0.000366	Carbon Metabolism, Choline Metabolism	NM_003109.1:5970
KRAS-mRNA	0.282	0.0334	0.216	0.347	2.98e-05	0.000451	Carbon Metabolism, Choline Metabolism	NM_004985.3:327
GPI-mRNA	0.35	0.043	0.266	0.434	3.83e-05	0.000567	Glucose Metabolism, KEGG Glycolysis	NM_000175.2:1695
SLC7A11-mRNA	0.946	0.116	0.718	1.17	3.87e-05	0.000567	Carbon Metabolism	NM_014331.3:636
EIF2AK3-mRNA	-0.958	0.119	-1.19	-0.725	4.11e-05	0.000592	Carbon Metabolism, Hypoxia Signaling	NM_004836.5:938
RPIA-mRNA	0.331	0.0416	0.249	0.412	4.53e-05	0.000642	Glucose Metabolism	NM_144563.2:1588
SLC25A1-mRNA	0.226	0.0285	0.17	0.282	4.68e-05	0.000652	Carbon Metabolism	NM_005984.2:964
PRKAB2-mRNA	-0.628	0.0803	-0.785	-0.47	5.16e-05	0.000708	Other Metabolic Pathway	NM_005399.3:1600
MAPK1-mRNA	-0.285	0.0371	-0.358	-0.213	5.78e-05	0.000781	Carbon Metabolism, Choline Metabolism, MTOR Pathway	NM_138957.2:430
ALDOA-mRNA	0.244	0.0323	0.181	0.307	6.58e-05	0.00086	Carbon Metabolism, Glucose Metabolism, KEGG Glycolysis	NM_184041.2:1455
IDH3A-mRNA	0.332	0.0439	0.246	0.418	6.58e-05	0.00086	Glucose Metabolism	NM_005530.2:1521
HRAS-mRNA	0.39	0.0516	0.288	0.491	6.66e-05	0.00086	Carbon Metabolism, Choline Metabolism	NM_005343.2:396
EIF4E2-mRNA	0.19	0.0261	0.139	0.241	8.55e-05	0.00108	Carbon Metabolism, Hypoxia Signaling, MTOR Pathway	NM_004846.3:670
PRKCB-mRNA	-1	0.138	-1.27	-0.733	8.59e-05	0.00108	Carbon Metabolism, Choline Metabolism	NM_212535.1:1750
RICTOR-mRNA	-0.765	0.106	-0.972	-0.559	8.78e-05	0.00108	MTOR Pathway	NM_152756.3:3097
FGFR3-mRNA	-0.313	0.0432	-0.397	-0.228	8.85e-05	0.00108	Carbon Metabolism	NM_022965.2:3170
SLC2A1-mRNA	-0.649	0.0906	-0.827	-0.472	9.56e-05	0.00114	Carbon Metabolism	NM_006516.2:2500
CS-mRNA	-0.258	0.036	-0.329	-0.188	9.58e-05	0.00114	Glucose Metabolism	NM_004077.2:740
RAC1-mRNA	-0.203	0.0287	-0.259	-0.147	0.000105	0.00123	Carbon Metabolism, Choline Metabolism	NM_198829.1:1250
SLC7A5-mRNA	0.608	0.0872	0.437	0.779	0.000115	0.00133	Carbon Metabolism	NM_003486.5:785
ENO3-mRNA	-1.4	0.206	-1.8	-0.991	0.000143	0.00163	Glucose Metabolism, KEGG Glycolysis	NM_001976.4:1368
VHL-mRNA	-0.385	0.0589	-0.5	-0.269	0.000183	0.00206	Hypoxia Signaling	NM_000551.2:1280
SLC2A4-mRNA	-1.75	0.272	-2.29	-1.22	0.0002	0.00223	Other Metabolic Pathway	NM_001042.2:2120
H6PD-mRNA	-1.01	0.162	-1.33	-0.696	0.000244	0.00267	Glucose Metabolism	NM_004285.3:7250
ERBB2-mRNA	-0.383	0.0622	-0.505	-0.261	0.000274	0.00298	Carbon Metabolism	NM_001005862.1:1255
PDP2-mRNA	-0.757	0.127	-1.01	-0.507	0.000344	0.00365	Glucose Metabolism	NM_020786.2:6505
HIF1A-mRNA	0.195	0.0328	0.131	0.26	0.000345	0.00365	Cancer Metabolism Drivers, Carbon Metabolism, Choline Metabolism, Hypoxia Signaling, MTOR Pathway	NM_001530.2:1985
FGFR1-mRNA	-0.573	0.0982	-0.766	-0.381	0.000387	0.00404	Carbon Metabolism	NM_015850.2:1335
PDK3-mRNA	0.451	0.0812	0.292	0.61	0.000539	0.00557	Glucose Metabolism	NM_005391.1:585
ALDOC-mRNA	0.528	0.102	0.328	0.728	0.000838	0.00856	Glucose Metabolism, KEGG Glycolysis	NM_005165.2:260
PDK4-mRNA	2.27	0.446	1.4	3.15	0.000935	0.00944	Glucose Metabolism	NM_002612.3:1675
PFKL-mRNA	0.412	0.0819	0.251	0.572	0.00101	0.0101	Carbon Metabolism, Glucose Metabolism, KEGG Glycolysis	NM_001002021.1:2410
ACO2-mRNA	-0.227	0.0453	-0.316	-0.138	0.00104	0.0103	Glucose Metabolism	NM_001098.2:1228
AKT2-mRNA	-0.224	0.045	-0.313	-0.136	0.00108	0.0105	Carbon Metabolism, Choline Metabolism, MTOR Pathway	NM_001626.2:1450
EGFR-mRNA	-0.49	0.0986	-0.683	-0.296	0.0011	0.0106	Carbon Metabolism, Choline Metabolism	NM_201282.1:360
MAP2K1-mRNA	0.288	0.0587	0.173	0.403	0.00119	0.0114	Carbon Metabolism, Choline Metabolism	NM_002755.2:970
G6PC3-mRNA	0.297	0.0616	0.176	0.417	0.00133	0.0125	Glucose Metabolism	NR_028582.1:708
EGLN1-mRNA	-0.187	0.0389	-0.263	-0.111	0.00135	0.0126	Hypoxia Signaling	NM_022051.1:3975
NRAS-mRNA	0.23	0.0484	0.135	0.325	0.00146	0.0135	Carbon Metabolism, Choline Metabolism	NM_002524.3:877
PRPS2-mRNA	0.107	0.0227	0.062	0.151	0.00156	0.0142	Glucose Metabolism	NM_001039091.1:545
ENO2-mRNA	-0.58	0.127	-0.829	-0.331	0.00185	0.0167	Glucose Metabolism, KEGG Glycolysis	NM_001975.2:1855
MDH1-mRNA	0.399	0.0881	0.226	0.572	0.00193	0.0173	Glucose Metabolism	NM_005917.3:970
PDGFRA-mRNA	0.813	0.181	0.459	1.17	0.00199	0.0177	Carbon Metabolism, Choline Metabolism	NM_006206.3:1925
MTOR-mRNA	-0.202	0.0461	-0.292	-0.112	0.00233	0.0204	Carbon Metabolism, Choline Metabolism, MTOR Pathway	NM_004958.2:5095
FGFR2-mRNA	-0.224	0.0514	-0.325	-0.124	0.0024	0.0209	Carbon Metabolism	NM_000141.4:647
GLS-mRNA	-0.27	0.0646	-0.396	-0.143	0.00308	0.0265	Carbon Metabolism	NM_014905.3:985
PIK3CB-mRNA	-0.378	0.0928	-0.56	-0.197	0.00354	0.0302	Carbon Metabolism, Choline Metabolism, MTOR Pathway	NM_006219.1:2945
OGDH-mRNA	-0.259	0.0647	-0.386	-0.133	0.00389	0.0329	Glucose Metabolism	NM_001003941.2:196
IDH3B-mRNA	0.185	0.0463	0.0939	0.276	0.00403	0.0337	Glucose Metabolism	NM_001258384.1:556
PIK3CD-mRNA	-0.535	0.145	-0.819	-0.252	0.00605	0.0501	Carbon Metabolism, Choline Metabolism, MTOR Pathway	NM_005026.3:2978
FH-mRNA	0.144	0.039	0.0676	0.221	0.00611	0.0501	Glucose Metabolism, Hypoxia Signaling	NM_000143.2:203
GSK3A-mRNA	-0.143	0.039	-0.22	-0.0669	0.00625	0.0508	Glucose Metabolism	NM_019884.2:480
PDK1-mRNA	-0.4	0.116	-0.628	-0.172	0.00887	0.0714	Carbon Metabolism, Glucose Metabolism, Hypoxia Signaling	NM_002610.3:401
LDHB-mRNA	0.265	0.0778	0.112	0.417	0.00934	0.0746	Hypoxia Signaling, KEGG Glycolysis	NM_001174097.1:586
DLD-mRNA	0.186	0.0553	0.0777	0.295	0.00988	0.0782	Glucose Metabolism, KEGG Glycolysis	NM_000108.3:766
FLT3-mRNA	-1.11	0.334	-1.76	-0.451	0.0107	0.0838	Carbon Metabolism	NM_004119.1:580
HK2-mRNA	-0.181	0.0587	-0.296	-0.0658	0.0151	0.117	Carbon Metabolism, Glucose Metabolism, KEGG Glycolysis	NM_000189.4:6880
SIRT3-mRNA	0.267	0.0884	0.0934	0.44	0.0166	0.128	Carbon Metabolism	NM_012239.5:1545
HK1-mRNA	0.154	0.0527	0.0504	0.257	0.0194	0.148	Carbon Metabolism, KEGG Glycolysis	NM_000188.2:3355
PLD1-mRNA	-0.381	0.137	-0.648	-0.113	0.0237	0.18	Choline Metabolism	NM_002662.3:1265
TIGAR-mRNA	0.267	0.0976	0.0753	0.458	0.0258	0.193	Other Metabolic Pathway	NM_020375.2:5245
NTRK3-mRNA	-0.813	0.305	-1.41	-0.215	0.0286	0.213	Carbon Metabolism	NM_001007156.1:552
SDHA-mRNA	-0.16	0.0601	-0.278	-0.042	0.0288	0.213	Glucose Metabolism	NM_004168.1:230
PRKAA2-mRNA	-0.232	0.0875	-0.403	-0.0603	0.0293	0.214	MTOR Pathway	NM_006252.2:975
KIT-mRNA	0.285	0.109	0.0716	0.499	0.0308	0.222	Carbon Metabolism	NM_000222.2:2644
SUCLG1-mRNA	0.141	0.0541	0.0354	0.247	0.0309	0.222	Glucose Metabolism	NM_003849.3:700
PLD2-mRNA	-0.21	0.0805	-0.368	-0.0523	0.0311	0.222	Choline Metabolism	NM_002663.4:598
SDHC-mRNA	-0.205	0.0814	-0.364	-0.0449	0.0363	0.257	Glucose Metabolism	NM_001035513.1:1748
PDP1-mRNA	0.263	0.107	0.0539	0.472	0.039	0.274	Hypoxia Signaling	NM_001161778.1:950
NOXA1-mRNA	-0.641	0.267	-1.16	-0.119	0.0429	0.299	Hypoxia Signaling	NM_006647.1:281
EIF2B4-mRNA	-0.277	0.116	-0.504	-0.0505	0.0434	0.299	Hypoxia Signaling	NM_172195.3:1390
RBKS-mRNA	0.492	0.205	0.0892	0.894	0.0435	0.299	Glucose Metabolism	NM_022128.2:908
RAF1-mRNA	-0.128	0.0545	-0.235	-0.0217	0.0461	0.314	Carbon Metabolism, Choline Metabolism	NM_002880.3:1444
GALM-mRNA	0.146	0.0644	0.02	0.272	0.0528	0.357	Glucose Metabolism, KEGG Glycolysis	NM_138801.2:1685
GLS2-mRNA	0.548	0.248	0.061	1.03	0.0585	0.392	Carbon Metabolism	NM_013267.2:1945
BECN1-mRNA	0.0464	0.0254	-0.00341	0.0961	0.105	0.701	Hypoxia Signaling	NM_003766.2:810
PDHA2-mRNA	0.28	0.158	-0.0298	0.59	0.114	0.756	Carbon Metabolism, KEGG Glycolysis	NM_005390.4:786
IDH3G-mRNA	0.0835	0.0533	-0.021	0.188	0.156	1	Glucose Metabolism	NM_004135.2:390
EPAS1-mRNA	-0.132	0.0862	-0.301	0.0368	0.164	1	Cancer Metabolism Drivers	NM_001430.3:4246
PDK2-mRNA	-0.123	0.0832	-0.286	0.0399	0.177	1	Glucose Metabolism	NM_002611.3:435
RPTOR-mRNA	-0.089	0.0604	-0.207	0.0293	0.179	1	MTOR Pathway	NM_020761.2:6665
AKT1-mRNA	0.0747	0.0507	-0.0246	0.174	0.179	1	Carbon Metabolism, Choline Metabolism, MTOR Pathway	NM_005163.2:1772
TALDO1-mRNA	-0.0539	0.038	-0.128	0.0206	0.194	1	Glucose Metabolism	NM_006755.1:262
MDH2-mRNA	-0.0354	0.026	-0.0863	0.0155	0.21	1	Glucose Metabolism	NM_005918.3:892
MAPK3-mRNA	0.0401	0.0334	-0.0253	0.106	0.264	1	Carbon Metabolism, Choline Metabolism, MTOR Pathway	NM_001040056.1:580
SLC1A5-mRNA	0.0485	0.0445	-0.0386	0.136	0.307	1	Carbon Metabolism	NM_001145144.1:180
GBE1-mRNA	0.0751	0.0689	-0.0599	0.21	0.307	1	Glucose Metabolism	NM_000158.3:1050
OAZ3-mRNA	0.221	0.219	-0.208	0.649	0.343	1	Other Metabolic Pathway	NM_016178.2:410
EGF-mRNA	0.402	0.411	-0.403	1.21	0.357	1	Carbon Metabolism, Choline Metabolism	NM_001963.4:1022
SLC2A3-mRNA	-0.141	0.156	-0.448	0.165	0.392	1	Other Metabolic Pathway	NM_006931.2:110
CAD-mRNA	-0.0468	0.0543	-0.153	0.0596	0.414	1	Other Metabolic Pathway	NM_004341.3:2380
PDGFC-mRNA	0.0422	0.0513	-0.0584	0.143	0.434	1	Carbon Metabolism, Choline Metabolism	NM_016205.2:1632
RPE-mRNA	0.0583	0.0729	-0.0846	0.201	0.447	1	Glucose Metabolism	NM_006916.1:596
SUCLA2-mRNA	0.0683	0.0952	-0.118	0.255	0.493	1	Glucose Metabolism	NM_003850.2:1288
MDH1B-mRNA	-0.123	0.298	-0.708	0.461	0.69	1	Glucose Metabolism	NM_001039845.2:538
PPARGC1A-mRNA	0.0306	0.101	-0.167	0.228	0.769	1	Other Metabolic Pathway	NM_013261.3:1505
PFKP-mRNA	0.0171	0.0605	-0.101	0.136	0.784	1	Carbon Metabolism, KEGG Glycolysis	NM_002627.3:795
SIRT6-mRNA	-0.0477	0.169	-0.379	0.284	0.785	1	Carbon Metabolism	NM_001193285.1:1049
RET-mRNA	0.0664	0.247	-0.419	0.551	0.795	1	Carbon Metabolism	NM_020630.4:2911
MET-mRNA	-0.0128	0.0836	-0.177	0.151	0.882	1	Carbon Metabolism	NM_001127500.1:1925

## Sheet: XPC LG vs. WT LG
	Log2 fold change	std error	Lower confidence limit	Upper confidence limit	P-value	BY.p.value	Gene.sets	probe.ID
MYC-mRNA	-1.5	0.0422	-1.58	-1.42	4.28e-10	3.76e-07	Cancer Metabolism Drivers, Carbon Metabolism	NM_002467.3:1610
PIK3CA-mRNA	-1.17	0.0377	-1.24	-1.1	1.26e-09	5.27e-07	Carbon Metabolism, Choline Metabolism, MTOR Pathway	NM_006218.2:2445
PRPS1-mRNA	0.935	0.0321	0.872	0.998	2.1e-09	5.27e-07	Glucose Metabolism	NM_002764.3:1081
PFKP-mRNA	-1.68	0.0605	-1.8	-1.56	3.02e-09	5.27e-07	Carbon Metabolism, KEGG Glycolysis	NM_002627.3:795
PKM-mRNA	0.928	0.034	0.862	0.995	3.47e-09	5.27e-07	Carbon Metabolism	NM_182471.1:2105
FH-mRNA	-1.06	0.039	-1.14	-0.985	3.6e-09	5.27e-07	Glucose Metabolism, Hypoxia Signaling	NM_000143.2:203
PGAM1-mRNA	0.817	0.0315	0.756	0.879	5.23e-09	6.56e-07	Carbon Metabolism, KEGG Glycolysis	NM_002629.2:1037
PGLS-mRNA	-1.27	0.0507	-1.37	-1.17	7.05e-09	7.17e-07	Glucose Metabolism	NM_012088.2:611
ODC1-mRNA	1.04	0.042	0.96	1.13	7.46e-09	7.17e-07	Other Metabolic Pathway	NM_002539.1:950
JUN-mRNA	-1.31	0.0534	-1.42	-1.21	8.17e-09	7.17e-07	Cancer Metabolism Drivers, Carbon Metabolism, Choline Metabolism	NM_002228.3:140
RPS6KB1-mRNA	-0.477	0.0211	-0.518	-0.435	1.58e-08	1.26e-06	Carbon Metabolism, Choline Metabolism, MTOR Pathway	NM_003161.2:310
PGK1-mRNA	0.632	0.0291	0.575	0.689	2.12e-08	1.55e-06	Carbon Metabolism, Glucose Metabolism, KEGG Glycolysis	NM_000291.2:1030
ACLY-mRNA	0.885	0.0414	0.804	0.967	2.42e-08	1.64e-06	Glucose Metabolism	NM_002197.2:2290
IKBKB-mRNA	-0.897	0.0453	-0.985	-0.808	4.41e-08	2.77e-06	MTOR Pathway	NM_001556.1:1995
G6PD-mRNA	0.559	0.029	0.502	0.616	5.48e-08	3.21e-06	Carbon Metabolism, Glucose Metabolism	NM_000402.2:1155
IDH2-mRNA	-0.673	0.0355	-0.743	-0.604	6.22e-08	3.42e-06	Cancer Metabolism Drivers, Glucose Metabolism	NM_002168.2:944
SLC7A11-mRNA	2.18	0.116	1.95	2.41	6.76e-08	3.49e-06	Carbon Metabolism	NM_014331.3:636
TKT-mRNA	-0.771	0.0416	-0.853	-0.69	7.44e-08	3.63e-06	Glucose Metabolism	NM_001064.2:1235
TPI1-mRNA	0.513	0.028	0.458	0.568	8.09e-08	3.74e-06	Glucose Metabolism, KEGG Glycolysis	NM_000365.4:1020
LDHA-mRNA	0.647	0.0361	0.576	0.718	9.64e-08	4.23e-06	Hypoxia Signaling, KEGG Glycolysis	NM_001165414.1:1690
SLC38A2-mRNA	-1.17	0.0666	-1.31	-1.04	1.09e-07	4.56e-06	Carbon Metabolism	NM_018976.4:1170
IDH1-mRNA	1.96	0.113	1.74	2.18	1.21e-07	4.82e-06	Cancer Metabolism Drivers, Glucose Metabolism	NM_005896.2:105
PFKM-mRNA	-0.47	0.0278	-0.524	-0.415	1.54e-07	5.89e-06	Carbon Metabolism, KEGG Glycolysis	NM_000289.5:2195
MLST8-mRNA	-0.59	0.0363	-0.661	-0.519	2.07e-07	7.56e-06	MTOR Pathway	NM_001199173.1:810
MAP2K2-mRNA	-0.727	0.0461	-0.817	-0.637	2.62e-07	9.21e-06	Carbon Metabolism, Choline Metabolism	NM_030662.2:1325
AKT3-mRNA	-0.957	0.0614	-1.08	-0.837	2.87e-07	9.69e-06	Carbon Metabolism, Choline Metabolism, MTOR Pathway	NM_005465.4:287
PTEN-mRNA	-0.851	0.0552	-0.959	-0.742	3.13e-07	1.02e-05	Carbon Metabolism	NM_000314.4:1351
FOXO3-mRNA	-0.483	0.0324	-0.547	-0.42	4.03e-07	1.23e-05	Other Metabolic Pathway	NM_001455.2:1860
PDHA1-mRNA	0.35	0.0235	0.304	0.396	4.05e-07	1.23e-05	Carbon Metabolism, Glucose Metabolism, KEGG Glycolysis	NM_000284.3:1080
SDHB-mRNA	-0.483	0.0329	-0.548	-0.419	4.56e-07	1.33e-05	Glucose Metabolism, Hypoxia Signaling	NM_003000.2:245
MTOR-mRNA	-0.664	0.0461	-0.754	-0.574	5.25e-07	1.44e-05	Carbon Metabolism, Choline Metabolism, MTOR Pathway	NM_004958.2:5095
GBE1-mRNA	0.992	0.0689	0.857	1.13	5.26e-07	1.44e-05	Glucose Metabolism	NM_000158.3:1050
PRPS2-mRNA	-0.322	0.0227	-0.366	-0.277	5.97e-07	1.59e-05	Glucose Metabolism	NM_001039091.1:545
FASN-mRNA	0.78	0.0577	0.667	0.893	8.61e-07	2.22e-05	Other Metabolic Pathway	NM_004104.4:5387
DLST-mRNA	-0.428	0.0318	-0.49	-0.366	8.88e-07	2.23e-05	Glucose Metabolism	NM_001933.4:2330
CS-mRNA	-0.457	0.036	-0.528	-0.386	1.41e-06	3.43e-05	Glucose Metabolism	NM_004077.2:740
PDHB-mRNA	0.622	0.0523	0.52	0.725	2.28e-06	5.4e-05	Carbon Metabolism, Glucose Metabolism, KEGG Glycolysis	NM_000925.3:555
ACO1-mRNA	0.802	0.0688	0.667	0.937	2.69e-06	6.21e-05	Glucose Metabolism	NM_002197.2:430
PLCG1-mRNA	-0.49	0.0425	-0.573	-0.407	2.9e-06	6.52e-05	Carbon Metabolism, Choline Metabolism	NM_002660.2:2290
ARNT-mRNA	-0.693	0.0605	-0.811	-0.574	3.05e-06	6.7e-05	Hypoxia Signaling	NM_178426.1:2235
MAPKAP1-mRNA	0.384	0.0344	0.317	0.452	3.69e-06	7.91e-05	MTOR Pathway	NM_001006617.1:1188
SLC25A1-mRNA	-0.3	0.0285	-0.356	-0.244	5.84e-06	0.000122	Carbon Metabolism	NM_005984.2:964
PRKAA1-mRNA	-0.435	0.0424	-0.518	-0.352	6.95e-06	0.000142	MTOR Pathway	NM_006251.5:1455
SLC16A1-mRNA	0.561	0.0556	0.452	0.67	7.95e-06	0.000159	Carbon Metabolism	NM_003051.3:635
RAC1-mRNA	-0.273	0.0287	-0.329	-0.216	1.24e-05	0.000243	Carbon Metabolism, Choline Metabolism	NM_198829.1:1250
EIF4EBP1-mRNA	-0.285	0.0309	-0.345	-0.224	1.57e-05	0.000294	Carbon Metabolism, Choline Metabolism, Hypoxia Signaling, MTOR Pathway	NM_004095.3:363
VEGFA-mRNA	-0.681	0.074	-0.826	-0.536	1.57e-05	0.000294	MTOR Pathway	NM_001025366.1:1325
TSC1-mRNA	-0.564	0.0617	-0.685	-0.443	1.64e-05	0.0003	Choline Metabolism, MTOR Pathway	NM_000368.3:100
BPGM-mRNA	0.573	0.0631	0.449	0.697	1.74e-05	0.000311	Glucose Metabolism, KEGG Glycolysis	NM_199186.1:1370
GPI-mRNA	0.385	0.043	0.301	0.469	1.91e-05	0.000335	Glucose Metabolism, KEGG Glycolysis	NM_000175.2:1695
PIK3CD-mRNA	-1.27	0.145	-1.55	-0.985	2.24e-05	0.000386	Carbon Metabolism, Choline Metabolism, MTOR Pathway	NM_005026.3:2978
SP1-mRNA	-0.556	0.0635	-0.68	-0.431	2.28e-05	0.000386	Carbon Metabolism, Choline Metabolism	NM_003109.1:5970
IDH3A-mRNA	0.38	0.0439	0.294	0.466	2.48e-05	0.00041	Glucose Metabolism	NM_005530.2:1521
SHMT1-mRNA	0.44	0.0518	0.339	0.542	2.8e-05	0.000453	Other Metabolic Pathway	NM_148918.1:1800
PDPR-mRNA	-0.692	0.0815	-0.851	-0.532	2.83e-05	0.000453	Glucose Metabolism	NM_017990.3:7080
GLS-mRNA	-0.538	0.0646	-0.665	-0.412	3.23e-05	0.000507	Carbon Metabolism	NM_014905.3:985
PRKCB-mRNA	-1.14	0.138	-1.41	-0.865	3.54e-05	0.000546	Carbon Metabolism, Choline Metabolism	NM_212535.1:1750
EIF2AK3-mRNA	-0.951	0.119	-1.18	-0.718	4.33e-05	0.000656	Carbon Metabolism, Hypoxia Signaling	NM_004836.5:938
SLC2A4-mRNA	-2.14	0.272	-2.67	-1.6	5.03e-05	0.000749	Other Metabolic Pathway	NM_001042.2:2120
RPIA-mRNA	0.325	0.0416	0.243	0.406	5.19e-05	0.00076	Glucose Metabolism	NM_144563.2:1588
RPS6KB2-mRNA	-0.377	0.0484	-0.472	-0.282	5.29e-05	0.000762	Carbon Metabolism, Choline Metabolism, MTOR Pathway	NM_003952.2:980
ENO2-mRNA	-0.984	0.127	-1.23	-0.735	5.51e-05	0.000781	Glucose Metabolism, KEGG Glycolysis	NM_001975.2:1855
RICTOR-mRNA	-0.813	0.106	-1.02	-0.606	5.71e-05	0.000796	MTOR Pathway	NM_152756.3:3097
TP53-mRNA	-0.254	0.0334	-0.32	-0.189	6.29e-05	0.000863	Cancer Metabolism Drivers, Carbon Metabolism	NM_000546.2:1330
SLC7A5-mRNA	0.657	0.0872	0.486	0.828	6.7e-05	0.000905	Carbon Metabolism	NM_003486.5:785
OAZ2-mRNA	0.254	0.0348	0.186	0.323	8.34e-05	0.00111	Other Metabolic Pathway	NM_002537.2:366
H6PD-mRNA	-1.09	0.162	-1.41	-0.771	0.000149	0.00196	Glucose Metabolism	NM_004285.3:7250
PFKL-mRNA	0.549	0.0819	0.388	0.709	0.000152	0.00197	Carbon Metabolism, Glucose Metabolism, KEGG Glycolysis	NM_001002021.1:2410
PDGFA-mRNA	-1.23	0.184	-1.59	-0.871	0.000155	0.00197	Carbon Metabolism, Choline Metabolism	NM_002607.5:1276
PRKAB2-mRNA	-0.528	0.0803	-0.685	-0.371	0.000174	0.00219	Other Metabolic Pathway	NM_005399.3:1600
ENO3-mRNA	-1.34	0.206	-1.74	-0.934	0.000191	0.00236	Glucose Metabolism, KEGG Glycolysis	NM_001976.4:1368
TALDO1-mRNA	-0.236	0.038	-0.311	-0.162	0.000254	0.0031	Glucose Metabolism	NM_006755.1:262
AKT2-mRNA	-0.279	0.045	-0.367	-0.191	0.000262	0.00315	Carbon Metabolism, Choline Metabolism, MTOR Pathway	NM_001626.2:1450
SUCLG1-mRNA	-0.328	0.0541	-0.434	-0.222	0.000303	0.00359	Glucose Metabolism	NM_003849.3:700
DLAT-mRNA	0.19	0.0318	0.128	0.253	0.000326	0.00381	Glucose Metabolism, KEGG Glycolysis	NM_001931.4:1744
SDHD-mRNA	0.397	0.0664	0.267	0.527	0.000329	0.00381	Glucose Metabolism	NM_003002.1:525
HK1-mRNA	-0.308	0.0527	-0.412	-0.205	0.000384	0.00438	Carbon Metabolism, KEGG Glycolysis	NM_000188.2:3355
MAP2K1-mRNA	0.34	0.0587	0.225	0.456	0.000408	0.00459	Carbon Metabolism, Choline Metabolism	NM_002755.2:970
EGFR-mRNA	-0.57	0.0986	-0.763	-0.377	0.000415	0.00461	Carbon Metabolism, Choline Metabolism	NM_201282.1:360
GALM-mRNA	-0.357	0.0644	-0.483	-0.23	0.000548	0.00602	Glucose Metabolism, KEGG Glycolysis	NM_138801.2:1685
HRAS-mRNA	0.284	0.0516	0.182	0.385	0.00058	0.00628	Carbon Metabolism, Choline Metabolism	NM_005343.2:396
EGLN3-mRNA	0.59	0.113	0.369	0.811	0.000781	0.00837	Carbon Metabolism, Hypoxia Signaling	NM_022073.3:800
KIT-mRNA	0.53	0.109	0.316	0.744	0.00126	0.0133	Carbon Metabolism	NM_000222.2:2644
MAPK1-mRNA	-0.18	0.0371	-0.252	-0.107	0.00127	0.0133	Carbon Metabolism, Choline Metabolism, MTOR Pathway	NM_138957.2:430
SLC2A1-mRNA	-0.438	0.0906	-0.615	-0.26	0.0013	0.0135	Carbon Metabolism	NM_006516.2:2500
EGLN1-mRNA	-0.187	0.0389	-0.264	-0.111	0.00133	0.0135	Hypoxia Signaling	NM_022051.1:3975
SCO2-mRNA	0.194	0.0405	0.114	0.273	0.00138	0.0139	Other Metabolic Pathway	NM_005138.2:783
FGFR1-mRNA	-0.464	0.0982	-0.657	-0.272	0.00148	0.0146	Carbon Metabolism	NM_015850.2:1335
PDP2-mRNA	-0.602	0.127	-0.852	-0.353	0.00148	0.0146	Glucose Metabolism	NM_020786.2:6505
PDK4-mRNA	2.09	0.446	1.22	2.97	0.00155	0.0152	Glucose Metabolism	NM_002612.3:1675
SLC2A3-mRNA	-0.725	0.156	-1.03	-0.419	0.00166	0.016	Other Metabolic Pathway	NM_006931.2:110
PDK2-mRNA	0.379	0.0832	0.216	0.542	0.00187	0.0179	Glucose Metabolism	NM_002611.3:435
SDHA-mRNA	-0.27	0.0601	-0.388	-0.153	0.00201	0.019	Glucose Metabolism	NM_004168.1:230
PRKAB1-mRNA	-0.183	0.0407	-0.263	-0.103	0.00204	0.019	Other Metabolic Pathway	NM_006253.4:1550
KRAS-mRNA	-0.148	0.0334	-0.214	-0.0828	0.00218	0.0201	Carbon Metabolism, Choline Metabolism	NM_004985.3:327
PDP1-mRNA	0.46	0.107	0.251	0.669	0.00256	0.0234	Hypoxia Signaling	NM_001161778.1:950
SUCLG2-mRNA	-0.202	0.0469	-0.294	-0.11	0.0026	0.0235	Glucose Metabolism	NM_001177599.1:600
G6PC3-mRNA	0.256	0.0616	0.135	0.376	0.00321	0.0288	Glucose Metabolism	NR_028582.1:708
OGDH-mRNA	-0.268	0.0647	-0.395	-0.141	0.00325	0.0288	Glucose Metabolism	NM_001003941.2:196
EGLN2-mRNA	0.215	0.0526	0.112	0.318	0.00351	0.0308	Carbon Metabolism, Hypoxia Signaling	NM_053046.3:1538
CAD-mRNA	-0.216	0.0543	-0.322	-0.109	0.00409	0.0356	Other Metabolic Pathway	NM_004341.3:2380
PDK3-mRNA	0.321	0.0812	0.162	0.48	0.00419	0.0361	Glucose Metabolism	NM_005391.1:585
HIF1A-mRNA	0.129	0.0328	0.0642	0.193	0.00444	0.0379	Cancer Metabolism Drivers, Carbon Metabolism, Choline Metabolism, Hypoxia Signaling, MTOR Pathway	NM_001530.2:1985
TSC2-mRNA	-0.197	0.0521	-0.299	-0.0947	0.0054	0.0456	Choline Metabolism, MTOR Pathway	NM_000548.3:2380
AKT1-mRNA	-0.191	0.0507	-0.29	-0.0913	0.00553	0.0462	Carbon Metabolism, Choline Metabolism, MTOR Pathway	NM_005163.2:1772
ENO1-mRNA	-0.104	0.0276	-0.158	-0.0496	0.00559	0.0463	Carbon Metabolism, Glucose Metabolism, KEGG Glycolysis	NM_001428.2:1689
RAF1-mRNA	0.192	0.0545	0.0851	0.299	0.00782	0.0642	Carbon Metabolism, Choline Metabolism	NM_002880.3:1444
MAPK3-mRNA	0.116	0.0334	0.0509	0.182	0.00826	0.0672	Carbon Metabolism, Choline Metabolism, MTOR Pathway	NM_001040056.1:580
HK2-mRNA	-0.197	0.0587	-0.312	-0.0823	0.00991	0.0797	Carbon Metabolism, Glucose Metabolism, KEGG Glycolysis	NM_000189.4:6880
FGFR3-mRNA	0.145	0.0432	0.0603	0.23	0.00999	0.0797	Carbon Metabolism	NM_022965.2:3170
PPARGC1A-mRNA	-0.332	0.101	-0.529	-0.134	0.0111	0.0879	Other Metabolic Pathway	NM_013261.3:1505
SUCLA2-mRNA	0.307	0.0952	0.12	0.493	0.0122	0.0953	Glucose Metabolism	NM_003850.2:1288
ERBB2-mRNA	-0.194	0.0622	-0.316	-0.0716	0.0144	0.112	Carbon Metabolism	NM_001005862.1:1255
GYS1-mRNA	0.167	0.0538	0.0612	0.272	0.0147	0.113	Glucose Metabolism	NM_002103.4:3286
RBKS-mRNA	0.629	0.205	0.227	1.03	0.0155	0.118	Glucose Metabolism	NM_022128.2:908
ALDOA-mRNA	-0.0976	0.0323	-0.161	-0.0343	0.0165	0.125	Carbon Metabolism, Glucose Metabolism, KEGG Glycolysis	NM_184041.2:1455
PLD1-mRNA	-0.403	0.137	-0.671	-0.135	0.0184	0.138	Choline Metabolism	NM_002662.3:1265
BECN1-mRNA	0.0733	0.0254	0.0235	0.123	0.0203	0.151	Hypoxia Signaling	NM_003766.2:810
EIF4E2-mRNA	0.0724	0.0261	0.0213	0.123	0.024	0.177	Carbon Metabolism, Hypoxia Signaling, MTOR Pathway	NM_004846.3:670
RPE-mRNA	-0.191	0.0729	-0.334	-0.0479	0.0308	0.225	Glucose Metabolism	NM_006916.1:596
IDH3B-mRNA	0.116	0.0463	0.025	0.207	0.037	0.268	Glucose Metabolism	NM_001258384.1:556
VHL-mRNA	-0.147	0.0589	-0.262	-0.0313	0.0374	0.269	Hypoxia Signaling	NM_000551.2:1280
PIK3CB-mRNA	-0.223	0.0928	-0.405	-0.041	0.043	0.307	Carbon Metabolism, Choline Metabolism, MTOR Pathway	NM_006219.1:2945
SIRT3-mRNA	0.203	0.0884	0.0299	0.376	0.0506	0.359	Carbon Metabolism	NM_012239.5:1545
NOXA1-mRNA	-0.554	0.267	-1.08	-0.0313	0.0714	0.502	Hypoxia Signaling	NM_006647.1:281
SDHC-mRNA	-0.16	0.0814	-0.319	-7.68e-06	0.0856	0.597	Glucose Metabolism	NM_001035513.1:1748
EPAS1-mRNA	-0.164	0.0862	-0.333	0.00482	0.0934	0.643	Cancer Metabolism Drivers	NM_001430.3:4246
EIF2B4-mRNA	-0.22	0.116	-0.446	0.00679	0.0938	0.643	Hypoxia Signaling	NM_172195.3:1390
MDH2-mRNA	-0.0453	0.026	-0.0962	0.00558	0.119	0.811	Glucose Metabolism	NM_005918.3:892
PRKAA2-mRNA	0.139	0.0875	-0.0326	0.31	0.151	1	MTOR Pathway	NM_006252.2:975
SLC1A5-mRNA	-0.0671	0.0445	-0.154	0.02	0.17	1	Carbon Metabolism	NM_001145144.1:180
OAZ3-mRNA	0.309	0.219	-0.12	0.738	0.196	1	Other Metabolic Pathway	NM_016178.2:410
PDK1-mRNA	-0.164	0.116	-0.392	0.0642	0.197	1	Carbon Metabolism, Glucose Metabolism, Hypoxia Signaling	NM_002610.3:401
MDH1-mRNA	0.119	0.0881	-0.0536	0.292	0.214	1	Glucose Metabolism	NM_005917.3:970
NTRK3-mRNA	-0.411	0.305	-1.01	0.187	0.215	1	Carbon Metabolism	NM_001007156.1:552
RET-mRNA	0.325	0.247	-0.16	0.81	0.226	1	Carbon Metabolism	NM_020630.4:2911
RPTOR-mRNA	0.0692	0.0604	-0.0491	0.188	0.285	1	MTOR Pathway	NM_020761.2:6665
FLT3-mRNA	-0.378	0.334	-1.03	0.277	0.291	1	Carbon Metabolism	NM_004119.1:580
EGF-mRNA	0.463	0.411	-0.343	1.27	0.293	1	Carbon Metabolism, Choline Metabolism	NM_001963.4:1022
PDGFRA-mRNA	0.157	0.181	-0.197	0.511	0.41	1	Carbon Metabolism, Choline Metabolism	NM_006206.3:1925
DLD-mRNA	0.0454	0.0553	-0.0631	0.154	0.436	1	Glucose Metabolism, KEGG Glycolysis	NM_000108.3:766
GSK3A-mRNA	-0.0293	0.039	-0.106	0.0471	0.474	1	Glucose Metabolism	NM_019884.2:480
ACO2-mRNA	-0.033	0.0453	-0.122	0.0558	0.487	1	Glucose Metabolism	NM_001098.2:1228
IDH3G-mRNA	0.0388	0.0533	-0.0657	0.143	0.487	1	Glucose Metabolism	NM_004135.2:390
PLD2-mRNA	-0.0582	0.0805	-0.216	0.0995	0.49	1	Choline Metabolism	NM_002663.4:598
FGFR2-mRNA	-0.0368	0.0514	-0.138	0.064	0.495	1	Carbon Metabolism	NM_000141.4:647
PDHA2-mRNA	0.106	0.158	-0.203	0.416	0.52	1	Carbon Metabolism, KEGG Glycolysis	NM_005390.4:786
GLS2-mRNA	0.149	0.248	-0.338	0.635	0.566	1	Carbon Metabolism	NM_013267.2:1945
MET-mRNA	0.0408	0.0836	-0.123	0.205	0.639	1	Carbon Metabolism	NM_001127500.1:1925
PDGFC-mRNA	0.0204	0.0513	-0.0801	0.121	0.701	1	Carbon Metabolism, Choline Metabolism	NM_016205.2:1632
SIRT6-mRNA	0.0553	0.169	-0.276	0.387	0.752	1	Carbon Metabolism	NM_001193285.1:1049
TIGAR-mRNA	0.03	0.0976	-0.161	0.221	0.767	1	Other Metabolic Pathway	NM_020375.2:5245
MDH1B-mRNA	0.0867	0.298	-0.498	0.671	0.779	1	Glucose Metabolism	NM_001039845.2:538
NRAS-mRNA	-0.0138	0.0484	-0.109	0.0811	0.783	1	Carbon Metabolism, Choline Metabolism	NM_002524.3:877
ALDOC-mRNA	-0.0289	0.102	-0.228	0.171	0.784	1	Glucose Metabolism, KEGG Glycolysis	NM_005165.2:260
LDHB-mRNA	0.00563	0.0778	-0.147	0.158	0.944	1	Hypoxia Signaling, KEGG Glycolysis	NM_001174097.1:586

## Sheet: XPC HG vs. WT LG
	Log2 fold change	std error	Lower confidence limit	Upper confidence limit	P-value	BY.p.value	Gene.sets	probe.ID
MYC-mRNA	-1.87	0.0422	-1.95	-1.79	7.43e-11	6.53e-08	Cancer Metabolism Drivers, Carbon Metabolism	NM_002467.3:1610
PIK3CA-mRNA	-1.33	0.0377	-1.4	-1.25	4.63e-10	2.03e-07	Carbon Metabolism, Choline Metabolism, MTOR Pathway	NM_006218.2:2445
JUN-mRNA	-1.55	0.0534	-1.65	-1.45	2.16e-09	4.4e-07	Cancer Metabolism Drivers, Carbon Metabolism, Choline Metabolism	NM_002228.3:140
IDH2-mRNA	-1	0.0355	-1.07	-0.934	2.67e-09	4.4e-07	Cancer Metabolism Drivers, Glucose Metabolism	NM_002168.2:944
PGLS-mRNA	-1.41	0.0507	-1.51	-1.31	2.98e-09	4.4e-07	Glucose Metabolism	NM_012088.2:611
FH-mRNA	-1.07	0.039	-1.14	-0.991	3.42e-09	4.4e-07	Glucose Metabolism, Hypoxia Signaling	NM_000143.2:203
PKM-mRNA	0.927	0.034	0.86	0.994	3.51e-09	4.4e-07	Carbon Metabolism	NM_182471.1:2105
PRPS1-mRNA	0.86	0.0321	0.797	0.923	4.08e-09	4.48e-07	Glucose Metabolism	NM_002764.3:1081
PGAM1-mRNA	0.807	0.0315	0.746	0.869	5.77e-09	5.63e-07	Carbon Metabolism, KEGG Glycolysis	NM_002629.2:1037
PFKM-mRNA	-0.69	0.0278	-0.744	-0.635	7.57e-09	6.44e-07	Carbon Metabolism, KEGG Glycolysis	NM_000289.5:2195
PFKP-mRNA	-1.49	0.0605	-1.6	-1.37	8.06e-09	6.44e-07	Carbon Metabolism, KEGG Glycolysis	NM_002627.3:795
PRPS2-mRNA	-0.528	0.0227	-0.573	-0.484	1.23e-08	8.98e-07	Glucose Metabolism	NM_001039091.1:545
ODC1-mRNA	0.969	0.042	0.887	1.05	1.33e-08	8.98e-07	Other Metabolic Pathway	NM_002539.1:950
RPS6KB1-mRNA	-0.473	0.0211	-0.515	-0.432	1.67e-08	1.05e-06	Carbon Metabolism, Choline Metabolism, MTOR Pathway	NM_003161.2:310
IKBKB-mRNA	-0.957	0.0453	-1.05	-0.868	2.65e-08	1.53e-06	MTOR Pathway	NM_001556.1:1995
FOXO3-mRNA	-0.676	0.0324	-0.739	-0.612	2.93e-08	1.53e-06	Other Metabolic Pathway	NM_001455.2:1860
TKT-mRNA	-0.866	0.0416	-0.947	-0.784	3.01e-08	1.53e-06	Glucose Metabolism	NM_001064.2:1235
PGK1-mRNA	0.601	0.0291	0.544	0.658	3.13e-08	1.53e-06	Carbon Metabolism, Glucose Metabolism, KEGG Glycolysis	NM_000291.2:1030
SLC38A2-mRNA	-1.34	0.0666	-1.47	-1.21	3.85e-08	1.78e-06	Carbon Metabolism	NM_018976.4:1170
MAP2K2-mRNA	-0.855	0.0461	-0.946	-0.765	7.37e-08	3.24e-06	Carbon Metabolism, Choline Metabolism	NM_030662.2:1325
MLST8-mRNA	-0.644	0.0363	-0.715	-0.573	1.04e-07	4.36e-06	MTOR Pathway	NM_001199173.1:810
LDHA-mRNA	0.637	0.0361	0.566	0.708	1.09e-07	4.36e-06	Hypoxia Signaling, KEGG Glycolysis	NM_001165414.1:1690
TPI1-mRNA	0.49	0.028	0.435	0.545	1.15e-07	4.41e-06	Glucose Metabolism, KEGG Glycolysis	NM_000365.4:1020
EIF4EBP1-mRNA	-0.523	0.0309	-0.583	-0.462	1.52e-07	5.53e-06	Carbon Metabolism, Choline Metabolism, Hypoxia Signaling, MTOR Pathway	NM_004095.3:363
ACLY-mRNA	0.697	0.0414	0.616	0.779	1.57e-07	5.53e-06	Glucose Metabolism	NM_002197.2:2290
MTOR-mRNA	-0.77	0.0461	-0.861	-0.68	1.65e-07	5.58e-06	Carbon Metabolism, Choline Metabolism, MTOR Pathway	NM_004958.2:5095
G6PD-mRNA	0.478	0.029	0.421	0.535	1.88e-07	6.11e-06	Carbon Metabolism, Glucose Metabolism	NM_000402.2:1155
AKT3-mRNA	-1	0.0614	-1.12	-0.881	2.02e-07	6.33e-06	Carbon Metabolism, Choline Metabolism, MTOR Pathway	NM_005465.4:287
IDH1-mRNA	1.81	0.113	1.59	2.03	2.3e-07	6.96e-06	Cancer Metabolism Drivers, Glucose Metabolism	NM_005896.2:105
VEGFA-mRNA	-1.12	0.074	-1.26	-0.971	3.7e-07	1.08e-05	MTOR Pathway	NM_001025366.1:1325
CS-mRNA	-0.532	0.036	-0.603	-0.461	4.35e-07	1.21e-05	Glucose Metabolism	NM_004077.2:740
SLC25A1-mRNA	-0.421	0.0285	-0.477	-0.365	4.41e-07	1.21e-05	Carbon Metabolism	NM_005984.2:964
PTEN-mRNA	-0.79	0.0552	-0.899	-0.682	5.53e-07	1.47e-05	Carbon Metabolism	NM_000314.4:1351
PLCG1-mRNA	-0.597	0.0425	-0.681	-0.514	6.35e-07	1.63e-05	Carbon Metabolism, Choline Metabolism	NM_002660.2:2290
TP53-mRNA	-0.468	0.0334	-0.534	-0.403	6.51e-07	1.63e-05	Cancer Metabolism Drivers, Carbon Metabolism	NM_000546.2:1330
SLC7A11-mRNA	1.58	0.116	1.36	1.81	8.14e-07	1.99e-05	Carbon Metabolism	NM_014331.3:636
GBE1-mRNA	0.934	0.0689	0.799	1.07	8.38e-07	1.99e-05	Glucose Metabolism	NM_000158.3:1050
DLST-mRNA	-0.425	0.0318	-0.487	-0.363	9.34e-07	2.16e-05	Glucose Metabolism	NM_001933.4:2330
PDHA1-mRNA	0.302	0.0235	0.256	0.348	1.25e-06	2.82e-05	Carbon Metabolism, Glucose Metabolism, KEGG Glycolysis	NM_000284.3:1080
ARNT-mRNA	-0.76	0.0605	-0.879	-0.642	1.5e-06	3.29e-05	Hypoxia Signaling	NM_178426.1:2235
SUCLG2-mRNA	-0.578	0.0469	-0.669	-0.486	1.75e-06	3.75e-05	Glucose Metabolism	NM_001177599.1:600
PRKAA1-mRNA	-0.513	0.0424	-0.596	-0.43	2.01e-06	4.2e-05	MTOR Pathway	NM_006251.5:1455
PDHB-mRNA	0.617	0.0523	0.514	0.719	2.43e-06	4.96e-05	Carbon Metabolism, Glucose Metabolism, KEGG Glycolysis	NM_000925.3:555
SDHB-mRNA	-0.363	0.0329	-0.427	-0.298	4.1e-06	8.19e-05	Glucose Metabolism, Hypoxia Signaling	NM_003000.2:245
FASN-mRNA	0.609	0.0577	0.495	0.722	5.7e-06	0.000111	Other Metabolic Pathway	NM_004104.4:5387
SLC2A4-mRNA	-2.82	0.272	-3.35	-2.28	6.59e-06	0.000126	Other Metabolic Pathway	NM_001042.2:2120
PDPR-mRNA	-0.82	0.0815	-0.98	-0.66	8.07e-06	0.00015	Glucose Metabolism	NM_017990.3:7080
TSC1-mRNA	-0.62	0.0617	-0.74	-0.499	8.18e-06	0.00015	Choline Metabolism, MTOR Pathway	NM_000368.3:100
ACO1-mRNA	0.686	0.0688	0.551	0.821	8.71e-06	0.000156	Glucose Metabolism	NM_002197.2:430
RAC1-mRNA	-0.282	0.0287	-0.338	-0.226	9.61e-06	0.000169	Carbon Metabolism, Choline Metabolism	NM_198829.1:1250
SP1-mRNA	-0.606	0.0635	-0.731	-0.482	1.2e-05	0.000204	Carbon Metabolism, Choline Metabolism	NM_003109.1:5970
OAZ2-mRNA	0.332	0.0348	0.264	0.4	1.21e-05	0.000204	Other Metabolic Pathway	NM_002537.2:366
H6PD-mRNA	-1.52	0.162	-1.84	-1.2	1.35e-05	0.000223	Glucose Metabolism	NM_004285.3:7250
SLC2A1-mRNA	-0.82	0.0906	-0.998	-0.643	1.77e-05	0.000288	Carbon Metabolism	NM_006516.2:2500
RICTOR-mRNA	-0.949	0.106	-1.16	-0.742	1.86e-05	0.000297	MTOR Pathway	NM_152756.3:3097
PRKAB2-mRNA	-0.717	0.0803	-0.874	-0.56	1.97e-05	0.000308	Other Metabolic Pathway	NM_005399.3:1600
RPS6KB2-mRNA	-0.429	0.0484	-0.524	-0.334	2.08e-05	0.000321	Carbon Metabolism, Choline Metabolism, MTOR Pathway	NM_003952.2:980
TALDO1-mRNA	-0.334	0.038	-0.409	-0.26	2.2e-05	0.000334	Glucose Metabolism	NM_006755.1:262
HK2-mRNA	-0.506	0.0587	-0.621	-0.391	2.55e-05	0.000379	Carbon Metabolism, Glucose Metabolism, KEGG Glycolysis	NM_000189.4:6880
PRKAB1-mRNA	-0.349	0.0407	-0.429	-0.269	2.67e-05	0.000391	Other Metabolic Pathway	NM_006253.4:1550
GLS-mRNA	-0.551	0.0646	-0.678	-0.424	2.73e-05	0.000393	Carbon Metabolism	NM_014905.3:985
BPGM-mRNA	0.536	0.0631	0.412	0.66	2.83e-05	0.000395	Glucose Metabolism, KEGG Glycolysis	NM_199186.1:1370
EIF2AK3-mRNA	-1.01	0.119	-1.24	-0.775	2.84e-05	0.000395	Carbon Metabolism, Hypoxia Signaling	NM_004836.5:938
PIK3CD-mRNA	-1.22	0.145	-1.51	-0.94	2.92e-05	0.000401	Carbon Metabolism, Choline Metabolism, MTOR Pathway	NM_005026.3:2978
MDH2-mRNA	-0.219	0.026	-0.27	-0.168	2.98e-05	0.000403	Glucose Metabolism	NM_005918.3:892
AKT2-mRNA	-0.378	0.045	-0.466	-0.29	3.08e-05	0.00041	Carbon Metabolism, Choline Metabolism, MTOR Pathway	NM_001626.2:1450
TSC2-mRNA	-0.435	0.0521	-0.537	-0.333	3.22e-05	0.000423	Choline Metabolism, MTOR Pathway	NM_000548.3:2380
AKT1-mRNA	-0.417	0.0507	-0.516	-0.317	3.58e-05	0.000462	Carbon Metabolism, Choline Metabolism, MTOR Pathway	NM_005163.2:1772
PDGFA-mRNA	-1.46	0.184	-1.82	-1.1	4.73e-05	0.000602	Carbon Metabolism, Choline Metabolism	NM_002607.5:1276
SLC16A1-mRNA	0.43	0.0556	0.321	0.539	5.55e-05	0.000696	Carbon Metabolism	NM_003051.3:635
MAPKAP1-mRNA	0.263	0.0344	0.195	0.33	6.1e-05	0.000755	MTOR Pathway	NM_001006617.1:1188
PRKCB-mRNA	-1.05	0.138	-1.32	-0.779	6.26e-05	0.000764	Carbon Metabolism, Choline Metabolism	NM_212535.1:1750
IDH3A-mRNA	0.332	0.0439	0.246	0.418	6.5e-05	0.000782	Glucose Metabolism	NM_005530.2:1521
EGLN1-mRNA	-0.288	0.0389	-0.365	-0.212	7.52e-05	0.000892	Hypoxia Signaling	NM_022051.1:3975
ENO3-mRNA	-1.5	0.206	-1.91	-1.1	8.53e-05	0.000999	Glucose Metabolism, KEGG Glycolysis	NM_001976.4:1368
FGFR1-mRNA	-0.701	0.0982	-0.894	-0.509	9.77e-05	0.00113	Carbon Metabolism	NM_015850.2:1335
SLC1A5-mRNA	-0.303	0.0445	-0.39	-0.216	0.000136	0.00155	Carbon Metabolism	NM_001145144.1:180
EGLN2-mRNA	0.346	0.0526	0.243	0.449	0.000172	0.00194	Carbon Metabolism, Hypoxia Signaling	NM_053046.3:1538
EGFR-mRNA	-0.648	0.0986	-0.841	-0.454	0.000175	0.00195	Carbon Metabolism, Choline Metabolism	NM_201282.1:360
EGLN3-mRNA	0.73	0.113	0.51	0.951	0.00019	0.00209	Carbon Metabolism, Hypoxia Signaling	NM_022073.3:800
RPIA-mRNA	0.269	0.0416	0.188	0.351	0.000192	0.00209	Glucose Metabolism	NM_144563.2:1588
SDHA-mRNA	-0.388	0.0601	-0.506	-0.27	0.000198	0.00212	Glucose Metabolism	NM_004168.1:230
SHMT1-mRNA	0.332	0.0518	0.23	0.433	0.000208	0.0022	Other Metabolic Pathway	NM_148918.1:1800
OGDH-mRNA	-0.409	0.0647	-0.535	-0.282	0.000229	0.00239	Glucose Metabolism	NM_001003941.2:196
SUCLG1-mRNA	-0.331	0.0541	-0.437	-0.225	0.000283	0.00293	Glucose Metabolism	NM_003849.3:700
SDHD-mRNA	0.39	0.0664	0.26	0.52	0.000372	0.0038	Glucose Metabolism	NM_003002.1:525
SCO2-mRNA	0.231	0.0405	0.152	0.311	0.000449	0.00454	Other Metabolic Pathway	NM_005138.2:783
VHL-mRNA	-0.319	0.0589	-0.435	-0.204	0.000633	0.00632	Hypoxia Signaling	NM_000551.2:1280
CAD-mRNA	-0.288	0.0543	-0.394	-0.181	0.000727	0.00718	Other Metabolic Pathway	NM_004341.3:2380
PDK4-mRNA	2.32	0.446	1.44	3.19	0.000825	0.00805	Glucose Metabolism	NM_002612.3:1675
PFKL-mRNA	0.416	0.0819	0.255	0.576	0.000958	0.00924	Carbon Metabolism, Glucose Metabolism, KEGG Glycolysis	NM_001002021.1:2410
PDP2-mRNA	-0.64	0.127	-0.889	-0.39	0.00102	0.00976	Glucose Metabolism	NM_020786.2:6505
ENO1-mRNA	-0.135	0.0276	-0.189	-0.0805	0.00124	0.0117	Carbon Metabolism, Glucose Metabolism, KEGG Glycolysis	NM_001428.2:1689
MAP2K1-mRNA	0.286	0.0587	0.171	0.401	0.00125	0.0117	Carbon Metabolism, Choline Metabolism	NM_002755.2:970
DLAT-mRNA	0.153	0.0318	0.0904	0.215	0.00135	0.0124	Glucose Metabolism, KEGG Glycolysis	NM_001931.4:1744
IDH3B-mRNA	0.22	0.0463	0.13	0.311	0.00143	0.0131	Glucose Metabolism	NM_001258384.1:556
BECN1-mRNA	0.12	0.0254	0.0704	0.17	0.00148	0.0134	Hypoxia Signaling	NM_003766.2:810
MAPK1-mRNA	-0.173	0.0371	-0.245	-0.1	0.00163	0.0146	Carbon Metabolism, Choline Metabolism, MTOR Pathway	NM_138957.2:430
KRAS-mRNA	-0.151	0.0334	-0.216	-0.0854	0.00197	0.0174	Carbon Metabolism, Choline Metabolism	NM_004985.3:327
HK1-mRNA	-0.237	0.0527	-0.34	-0.134	0.00202	0.0177	Carbon Metabolism, KEGG Glycolysis	NM_000188.2:3355
ENO2-mRNA	-0.537	0.127	-0.786	-0.288	0.00289	0.0251	Glucose Metabolism, KEGG Glycolysis	NM_001975.2:1855
PDP1-mRNA	0.449	0.107	0.24	0.658	0.00296	0.0255	Hypoxia Signaling	NM_001161778.1:950
EIF2B4-mRNA	-0.485	0.116	-0.712	-0.258	0.00302	0.0257	Hypoxia Signaling	NM_172195.3:1390
GALM-mRNA	-0.256	0.0644	-0.383	-0.13	0.00405	0.0342	Glucose Metabolism, KEGG Glycolysis	NM_138801.2:1685
ACO2-mRNA	-0.179	0.0453	-0.268	-0.0901	0.00424	0.0355	Glucose Metabolism	NM_001098.2:1228
GPI-mRNA	0.169	0.043	0.0847	0.253	0.00435	0.0361	Glucose Metabolism, KEGG Glycolysis	NM_000175.2:1695
PIK3CB-mRNA	-0.355	0.0928	-0.536	-0.173	0.00508	0.0416	Carbon Metabolism, Choline Metabolism, MTOR Pathway	NM_006219.1:2945
FGFR2-mRNA	-0.196	0.0514	-0.297	-0.0955	0.00511	0.0416	Carbon Metabolism	NM_000141.4:647
HRAS-mRNA	0.197	0.0516	0.0953	0.298	0.0052	0.0417	Carbon Metabolism, Choline Metabolism	NM_005343.2:396
PDGFRA-mRNA	0.686	0.181	0.332	1.04	0.00523	0.0417	Carbon Metabolism, Choline Metabolism	NM_006206.3:1925
ALDOA-mRNA	-0.119	0.0323	-0.182	-0.056	0.00609	0.0482	Carbon Metabolism, Glucose Metabolism, KEGG Glycolysis	NM_184041.2:1455
SDHC-mRNA	-0.3	0.0814	-0.46	-0.141	0.00614	0.0482	Glucose Metabolism	NM_001035513.1:1748
SUCLA2-mRNA	0.346	0.0952	0.16	0.533	0.00659	0.0513	Glucose Metabolism	NM_003850.2:1288
KIT-mRNA	0.366	0.109	0.152	0.58	0.01	0.0771	Carbon Metabolism	NM_000222.2:2644
GSK3A-mRNA	-0.13	0.039	-0.207	-0.0541	0.0101	0.0772	Glucose Metabolism	NM_019884.2:480
ERBB2-mRNA	-0.197	0.0622	-0.319	-0.0747	0.0134	0.101	Carbon Metabolism	NM_001005862.1:1255
EIF4E2-mRNA	0.0818	0.0261	0.0307	0.133	0.0139	0.104	Carbon Metabolism, Hypoxia Signaling, MTOR Pathway	NM_004846.3:670
PDK1-mRNA	-0.364	0.116	-0.592	-0.136	0.014	0.104	Carbon Metabolism, Glucose Metabolism, Hypoxia Signaling	NM_002610.3:401
RAF1-mRNA	0.17	0.0545	0.0627	0.276	0.0144	0.106	Carbon Metabolism, Choline Metabolism	NM_002880.3:1444
RBKS-mRNA	0.606	0.205	0.203	1.01	0.0184	0.135	Glucose Metabolism	NM_022128.2:908
SLC7A5-mRNA	0.255	0.0872	0.0842	0.426	0.0191	0.139	Carbon Metabolism	NM_003486.5:785
PDK2-mRNA	0.239	0.0832	0.076	0.402	0.0207	0.149	Glucose Metabolism	NM_002611.3:435
PDHA2-mRNA	0.447	0.158	0.137	0.757	0.0223	0.159	Carbon Metabolism, KEGG Glycolysis	NM_005390.4:786
PDK3-mRNA	0.209	0.0812	0.0501	0.368	0.0328	0.232	Glucose Metabolism	NM_005391.1:585
RPE-mRNA	-0.178	0.0729	-0.321	-0.0352	0.0404	0.284	Glucose Metabolism	NM_006916.1:596
NOXA1-mRNA	-0.634	0.267	-1.16	-0.111	0.0447	0.312	Hypoxia Signaling	NM_006647.1:281
PLD1-mRNA	-0.313	0.137	-0.58	-0.0447	0.0515	0.356	Choline Metabolism	NM_002662.3:1265
ALDOC-mRNA	-0.222	0.102	-0.422	-0.0225	0.0607	0.417	Glucose Metabolism, KEGG Glycolysis	NM_005165.2:260
HIF1A-mRNA	0.0652	0.0328	0.000846	0.13	0.0823	0.56	Cancer Metabolism Drivers, Carbon Metabolism, Choline Metabolism, Hypoxia Signaling, MTOR Pathway	NM_001530.2:1985
SLC2A3-mRNA	0.308	0.156	0.00198	0.614	0.084	0.568	Other Metabolic Pathway	NM_006931.2:110
GLS2-mRNA	0.4	0.248	-0.0867	0.886	0.146	0.978	Carbon Metabolism	NM_013267.2:1945
PLD2-mRNA	-0.125	0.0805	-0.283	0.0326	0.159	1	Choline Metabolism	NM_002663.4:598
MDH1-mRNA	0.13	0.0881	-0.0429	0.302	0.179	1	Glucose Metabolism	NM_005917.3:970
GYS1-mRNA	0.0758	0.0538	-0.0297	0.181	0.197	1	Glucose Metabolism	NM_002103.4:3286
EGF-mRNA	0.557	0.411	-0.249	1.36	0.213	1	Carbon Metabolism, Choline Metabolism	NM_001963.4:1022
NTRK3-mRNA	-0.407	0.305	-1	0.191	0.219	1	Carbon Metabolism	NM_001007156.1:552
RET-mRNA	0.325	0.247	-0.16	0.81	0.226	1	Carbon Metabolism	NM_020630.4:2911
PDGFC-mRNA	-0.0658	0.0513	-0.166	0.0348	0.236	1	Carbon Metabolism, Choline Metabolism	NM_016205.2:1632
G6PC3-mRNA	0.0784	0.0616	-0.0423	0.199	0.239	1	Glucose Metabolism	NR_028582.1:708
DLD-mRNA	0.0678	0.0553	-0.0407	0.176	0.255	1	Glucose Metabolism, KEGG Glycolysis	NM_000108.3:766
FLT3-mRNA	-0.376	0.334	-1.03	0.279	0.293	1	Carbon Metabolism	NM_004119.1:580
MET-mRNA	-0.0829	0.0836	-0.247	0.0809	0.35	1	Carbon Metabolism	NM_001127500.1:1925
PPARGC1A-mRNA	-0.097	0.101	-0.295	0.101	0.365	1	Other Metabolic Pathway	NM_013261.3:1505
PRKAA2-mRNA	0.0759	0.0875	-0.0956	0.247	0.411	1	MTOR Pathway	NM_006252.2:975
NRAS-mRNA	0.0411	0.0484	-0.0538	0.136	0.42	1	Carbon Metabolism, Choline Metabolism	NM_002524.3:877
SIRT6-mRNA	-0.102	0.169	-0.433	0.23	0.565	1	Carbon Metabolism	NM_001193285.1:1049
RPTOR-mRNA	0.0341	0.0604	-0.0842	0.152	0.588	1	MTOR Pathway	NM_020761.2:6665
SIRT3-mRNA	-0.0451	0.0884	-0.218	0.128	0.623	1	Carbon Metabolism	NM_012239.5:1545
FGFR3-mRNA	0.0204	0.0432	-0.0642	0.105	0.649	1	Carbon Metabolism	NM_022965.2:3170
LDHB-mRNA	-0.0361	0.0778	-0.189	0.116	0.655	1	Hypoxia Signaling, KEGG Glycolysis	NM_001174097.1:586
MDH1B-mRNA	0.123	0.298	-0.462	0.708	0.692	1	Glucose Metabolism	NM_001039845.2:538
EPAS1-mRNA	0.0344	0.0862	-0.135	0.203	0.701	1	Cancer Metabolism Drivers	NM_001430.3:4246
MAPK3-mRNA	-0.00972	0.0334	-0.0752	0.0557	0.778	1	Carbon Metabolism, Choline Metabolism, MTOR Pathway	NM_001040056.1:580
TIGAR-mRNA	0.0259	0.0976	-0.165	0.217	0.797	1	Other Metabolic Pathway	NM_020375.2:5245
IDH3G-mRNA	0.00326	0.0533	-0.101	0.108	0.953	1	Glucose Metabolism	NM_004135.2:390
OAZ3-mRNA	-0.0113	0.219	-0.44	0.418	0.96	1	Other Metabolic Pathway	NM_016178.2:410
